# Supplementary material for: Area-Level Associations between Built Environment Characteristics and Disability Prevalence in Australia: An Ecological Analysis
Source: MDPI journal article supplement (doi:10.3390/ijerph17217844), 2020-10-26
Supplement: s1 [file s1]

## Supplementary file: Correlations between selected built environment indicators

**Table S1.** Correlation coefficients for food environment indicators.

|                | <b>food_02</b> | <b>food_04</b> | <b>food_07</b> | <b>food_06</b> | <b>food_21</b> |
|----------------|----------------|----------------|----------------|----------------|----------------|
| <b>food_04</b> | 0.6787         | 1              |                |                |                |
| <b>food_07</b> | 0.0627         | 0.0319         | 1              |                |                |
| <b>food_06</b> | -0.0338        | -0.1124        | 0.6258         | 1              |                |
| <b>food_21</b> | -0.3125        | -0.4314        | -0.1335        | 0.0874         | 1              |
| <b>food_23</b> | 0.4392         | 0.6115         | 0.0612         | -0.0629        | -0.5261        |

Key to variables:

- food\_02: Count of fruit and vegetable grocers within 3200m
- food\_04: Count of 'healthier' food options (supermarkets or fruit and vegetable grocers) within 3200m (renamed 'Number of healthier food options')
- food\_07: Healthy food choices ratio (ratio of healthier to fast-food options within 3200m)
- food\_06: Healthy food choices percentage (percentage of 'healthier' relative to healthier and fast-food options combined within 3200m) (renamed 'Healthier food proportion')
- food\_21: Percentage of dwellings with no availability of healthy or unhealthy food within 3200m
- food\_23: Percentage of dwellings within 1000m walking distance of a supermarket

**Table S2.** Correlation coefficients for walkability indicators.

|                  | <b>walk_20</b> | <b>walk_19</b> | <b>walk_18</b> | <b>walk_nat</b> |
|------------------|----------------|----------------|----------------|-----------------|
| <b>walk_19</b>   | 0.4874         | 1              |                |                 |
| <b>walk_18</b>   | 0.4893         | 0.5992         | 1              |                 |
| <b>walk_nat</b>  | 0.7403         | 0.8533         | 0.8751         | 1               |
| <b>walk_city</b> | 0.7262         | 0.8071         | 0.7965         | 0.9393          |

Key to variables:

- walk\_20\_hard: Average daily living destination access score for local 1600 metres walkable neighbourhoods
- walk\_19: Average street connectivity per square kilometre for local 1600 metres walkable neighbourhoods within area
- walk\_18: Average dwelling density per hectare for local 1600 metres walkable neighbourhoods within area
- walk\_nat: Average walkability index for local 1600 metres walkable neighbourhoods, relative to 21 cities
- walk\_city: Average walkability index for local 1600 metres walkable neighbourhoods, relative to study region (renamed 'Walkability')

**Table S3.** Correlation coefficients for public open space indicators.

|                 | <b>os1_hard</b> |
|-----------------|-----------------|
| <b>os2_hard</b> | 0.74            |

Key to variables:

- os1\_hard: Percentage of dwellings within 400m of public open space (renamed 'Public open space proximity')
- os2\_hard: Percentage of dwellings within 400m of public open space > 1.5 Ha area
